# Supplementary material for: Protective Effects of Miswak (Salvadora persica) against Experimentally Induced Gastric Ulcers in Rats
Source: Hindawi journal article supplement (doi:10.1155/2018/6703296), 2018-01-01
Supplement: f1 [file 6703296.f1.pdf]

## Supplemental Figure Legend

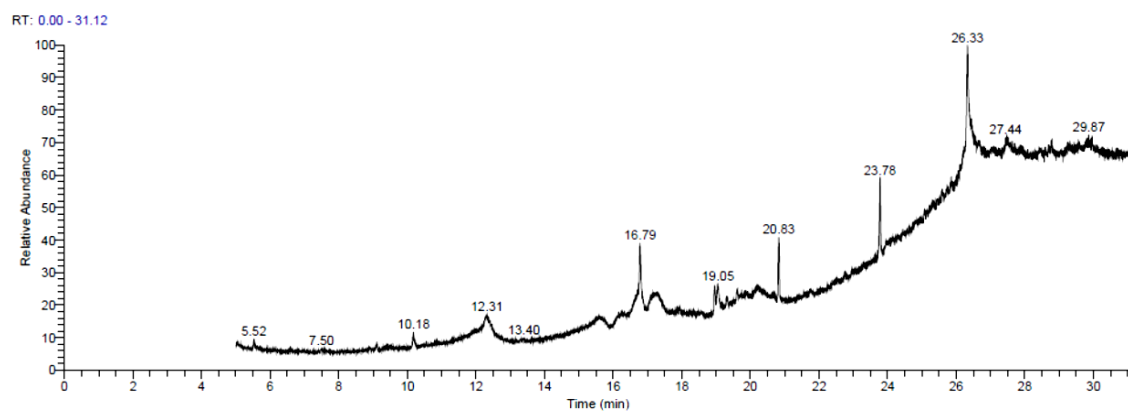

S1. Fig.1. Chromatogram of GC-MS analysis of *S. persica* extract
